# Supplementary material
Source: Springer Nature journal article supplement (https://www.springermedizin.de/resource/supplementary/13063_2014_2146_MOESM5_ESM.pdf/9621514)
Supplement: MOESM5 [file 9621514]

|                                                                   | Age     | Sex | After hours presentation | Age   | Profession | Seniority | Special interest in mTBI | Baseline self-report to adhere to recommended practice | Baseline intention to adhere to recommended practice | Baseline Behaviour specific cognitions | Annual presentation rate 2012* | Rurality (metropolitan/regional)* | Existence of mTBI protocol* | NET or NET-Plus* | Organisational history of change | Organisational learning | Leadership | Staff culture | Team tenure | mTBI-related team climate | Organisational readiness |   |
|-------------------------------------------------------------------|---------|-----|--------------------------|-------|------------|-----------|--------------------------|--------------------------------------------------------|------------------------------------------------------|----------------------------------------|--------------------------------|-----------------------------------|-----------------------------|------------------|----------------------------------|-------------------------|------------|---------------|-------------|---------------------------|--------------------------|---|
|                                                                   | Patient |     |                          | Staff |            |           |                          |                                                        |                                                      |                                        | Organisational                 |                                   |                             |                  |                                  |                         |            |               |             |                           |                          |   |
| <b>Clinical practice outcomes</b>                                 |         |     |                          |       |            |           |                          |                                                        |                                                      |                                        |                                |                                   |                             |                  |                                  |                         |            |               |             |                           |                          |   |
| Appropriate PTA screening (PTA)                                   | √       | √   | √                        |       |            |           |                          |                                                        |                                                      |                                        | √                              | √                                 | √                           | √                |                                  |                         |            |               |             |                           |                          |   |
| Other PTA measures                                                | √       | √   | √                        |       |            |           |                          |                                                        |                                                      |                                        | √                              | √                                 | √                           | √                |                                  |                         |            |               |             |                           |                          |   |
| CT scanning (CT)                                                  | √       | √   | √                        |       |            |           |                          |                                                        |                                                      |                                        | √                              | √                                 | √                           | √                |                                  |                         |            |               |             |                           |                          |   |
| Provision of patient information (INFO)                           | √       | √   | √                        |       |            |           |                          |                                                        |                                                      |                                        | √                              | √                                 | √                           | √                |                                  |                         |            |               |             |                           |                          |   |
| Safe discharge based on PTA and INFO                              | √       | √   | √                        |       |            |           |                          |                                                        |                                                      |                                        | √                              | √                                 | √                           | √                |                                  |                         |            |               |             |                           |                          |   |
| Safe discharge based on PTA, CT and INFO                          | √       | √   | √                        |       |            |           |                          |                                                        |                                                      |                                        | √                              | √                                 | √                           | √                |                                  |                         |            |               |             |                           |                          |   |
| <b>Proxy measures of clinical practice</b>                        |         |     |                          |       |            |           |                          |                                                        |                                                      |                                        |                                |                                   |                             |                  |                                  |                         |            |               |             |                           |                          |   |
| Self-report adherence to recommended clinical practice            |         |     |                          | √     | √          | √         | √                        | √                                                      |                                                      |                                        |                                |                                   |                             |                  |                                  |                         |            |               |             |                           |                          |   |
| Behavioural simulation to adhere to recommended clinical practice |         |     |                          | √     | √          | √         | √                        |                                                        |                                                      |                                        |                                |                                   |                             |                  |                                  |                         |            |               |             |                           |                          |   |
| <b>Hypothesised mediators</b>                                     |         |     |                          |       |            |           |                          |                                                        |                                                      |                                        |                                |                                   |                             |                  |                                  |                         |            |               |             |                           |                          |   |
| Intention to adhere to clinical practice recommendation           |         |     |                          | √     | √          | √         | √                        |                                                        | √                                                    |                                        |                                |                                   |                             |                  |                                  |                         |            |               |             |                           | √                        | √ |
| Cognitions regarding mTBI related team climate                    |         |     |                          | √     | √          | √         | √                        |                                                        |                                                      |                                        |                                |                                   |                             |                  |                                  |                         |            |               |             | √                         | √                        | √ |
| Behaviourally-specific cognitions                                 |         |     |                          | √     | √          | √         | √                        |                                                        |                                                      | √                                      |                                |                                   |                             |                  |                                  |                         |            |               |             |                           | √                        | √ |

\*=Minimisation factor
